# Supplementary material for: Crystal structure, thermal decomposition, mechanical sensitivity of Na[CL-14·2H2O] and its catalytic effect on the thermal decomposition of ammonium nitrate
Source: Royal Society of Chemistry journal article supplement (doi:10.1039/c5ra13156a), 2015-01-01
Supplement: c5ra13156a1.pdf [file c5ra13156a1.pdf]

**Table 1** Selected bond distances (Å) and angles (°) for Na[CL-14·2H<sub>2</sub>O]

| Bond distances   |            |                  |            |
|------------------|------------|------------------|------------|
| Na-O(1)          | 2.579(4)   | Na-O(2)          | 2.373(4)   |
| Na-O(3)          | 2.361(4)   | Na-O(2)#2        | 2.624(4)   |
| Na-O(8)#1        | 2.842(4)   | Na-N(3)          | 2.421(4)   |
| Na-N(3)#1        | 2.539(4)   |                  |            |
| Bond angles      |            |                  |            |
| O(1)-Na-O(2)     | 80.27(14)  | O(1)-Na-O(3)     | 160.14(17) |
| O(1)-Na-O(2)#2   | 118.96(13) | O(1)-Na-O(8)#1   | 80.20(13)  |
| O(1)-Na-N(3)     | 60.76(13)  | O(1)-Na-N(3)#1   | 108.80(14) |
| O(2)-Na-O(3)     | 94.71(15)  | O(2)-Na-O(2)#2   | 77.21(14)  |
| O(2)-Na-O(8)#1   | 132.78(15) | O(2)-Na-N(3)     | 101.82(14) |
| O(2)-Na-N(3)#1   | 162.32(16) | O(3)-Na-N(3)     | 138.94(16) |
| O(3)-Na-N(3)#1   | 81.52(14)  | O(3)-Na-O(2)#2   | 77.97(13)  |
| O(3)-Na-O(8)#1   | 89.60(13)  | N(3)-Na-O(2)#2   | 69.67(13)  |
| N(3)-Na-O(8)#1   | 105.20(14) | N(3)-Na-N(3)#1   | 71.41(14)  |
| O(2)#2-Na-O(8)#1 | 148.86(13) | N(3)#1-Na-O(2)#2 | 85.11(13)  |
| N(3)#1-Na-O(8)#1 | 64.71(12)  |                  |            |

Symmetry transformations used to generate equivalent atoms: #1 -x,-y,-z; #2 -x,-y,-z+1.

**Table 2** Hydrogen-bond geometry (Å, °).

| D-A···H             | D-H  | H···A | D···A    | ∠D-A···H |
|---------------------|------|-------|----------|----------|
| N(3)-H(3B)···O(8)   | 0.86 | 2.23  | 2.890(5) | 134      |
| N(3)-H(3B)···N(2)   | 0.86 | 2.48  | 2.818(5) | 104      |
| N(5)-H(5A)···O(4)   | 0.86 | 1.92  | 2.576(5) | 132      |
| N(5)-H(5A)···N(4)   | 0.86 | 2.50  | 2.833(6) | 104      |
| N(5)-H(5B)···O(5)   | 0.86 | 1.93  | 2.586(5) | 133      |
| N(5)-H(5B)···N(6)   | 0.86 | 2.53  | 2.861(6) | 104      |
| O(3)-H(3D)···O(5)#3 | 0.85 | 2.17  | 2.902(5) | 144      |
| O(3)-H(3C)···O(4)#4 | 0.82 | 2.37  | 3.189(5) | 175      |
| N(5)-H(5A)···O(6)#5 | 0.86 | 2.29  | 2.932(6) | 131      |

|                     |      |      |          |     |
|---------------------|------|------|----------|-----|
| N(5)-H(5B)···N(1)#5 | 0.86 | 2.41 | 3.078(6) | 135 |
| O(2)-H(2A)···O(1)#6 | 0.85 | 2.10 | 2.846(5) | 145 |

Symmetry transformations used to generate equivalent atoms: #3-1+x, y, z; #4-x, -1/2+y, 1/2-z; #5 1-x, 1/2+y, 1/2-z; #6 x, 1/2-y, 1/2+z.

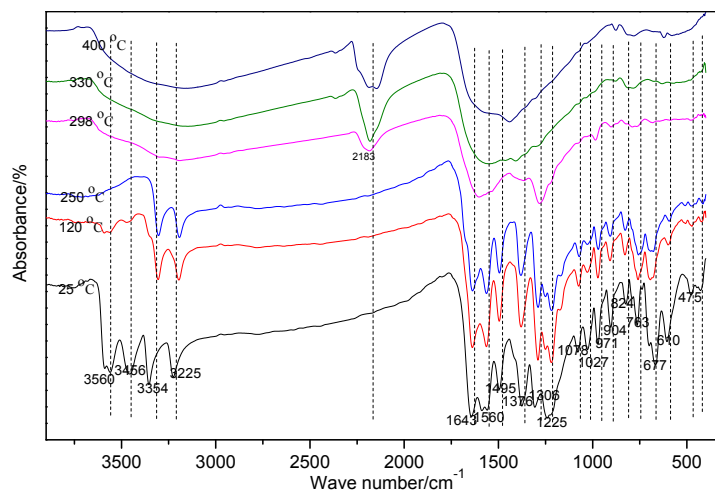

**Fig. 1** The FTIR spectrums of the solid residues for Na[CL-14·2H<sub>2</sub>O] thermal decomposition under the heating rate of 5 °C /min at different temperatures

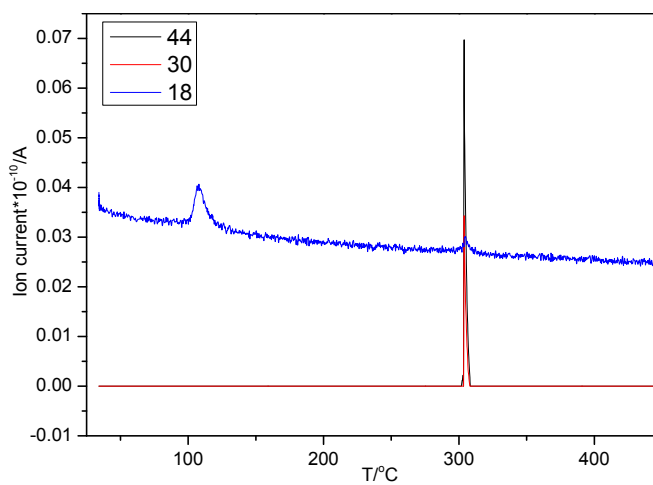

**Fig. 2** MS signals of gas products for thermal decomposition of Na[CL-14·2H<sub>2</sub>O] with nitrogen atmosphere at the heating rate of 5 °C/min

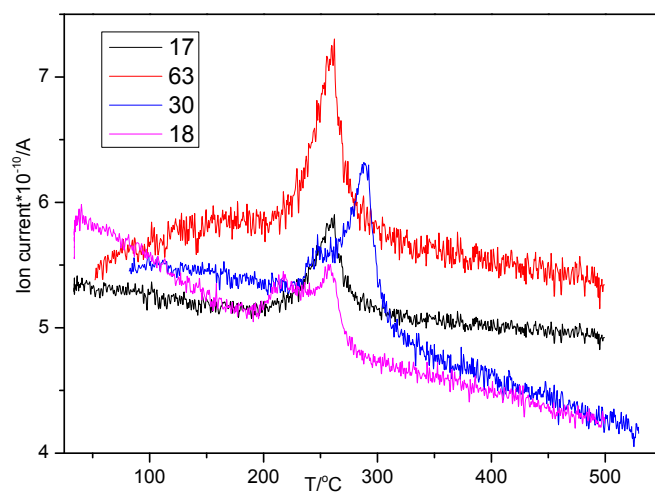

Fig. 3 MS signals of gas products for thermal decomposition of AN/Na[CL-14·2H<sub>2</sub>O] with nitrogen atmosphere at the heating rate of 10 °C/min
